# Supplementary material for: Autoantibodies stabilize neutrophil extracellular traps in COVID-19
Source: JCI journal article supplement (doi:10.1172/jci.insight.150111), 2021-06-24
Supplement: sd1 [file 1]

Supplementary Materials

**Autoantibodies stabilize neutrophil extracellular traps in COVID-19**

*Zuo et al.*

**Supplementary Table 1:** Correlation of anti-NET IgG/IgM with antiphospholipid antibodies in COVID patients

|                                                                                                                                                                                                              | Anti-NET IgG |      |                     | Anti-NET IgM |      |
|--------------------------------------------------------------------------------------------------------------------------------------------------------------------------------------------------------------|--------------|------|---------------------|--------------|------|
|                                                                                                                                                                                                              | r            | p    |                     | r            | p    |
| <b>Antiphospholipid antibodies</b>                                                                                                                                                                           |              |      |                     |              |      |
| aCL IgG                                                                                                                                                                                                      | 0.45         | **** | aCL IgM             | 0.34         | **** |
| a $\beta_2$ GPI IgG                                                                                                                                                                                          | 0.0004       | ns   | a $\beta_2$ GPI IgM | 0.18         | *    |
| aPS/PT IgG                                                                                                                                                                                                   | 0.27         | ***  | aPS/PT IgM          | 0.44         | **** |
| aCL, anticardiolipin antibodies; a $\beta_2$ GPI, anti-beta-2 glycoprotein I antibodies; aPS/PT, anti-phosphatidylserine/prothrombin antibodies<br>ns=not significant; *p<0.05, ***p<0.001, and ****p<0.0001 |              |      |                     |              |      |

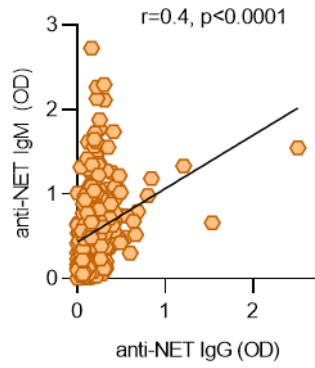

**Supplementary Figure 1: Association of anti-NET IgG with anti-NET IgM.** Anti-NET IgG and anti-NET IgM were compared for 328 COVID patients. Spearman's correlation coefficient was calculated and is shown in the panel.

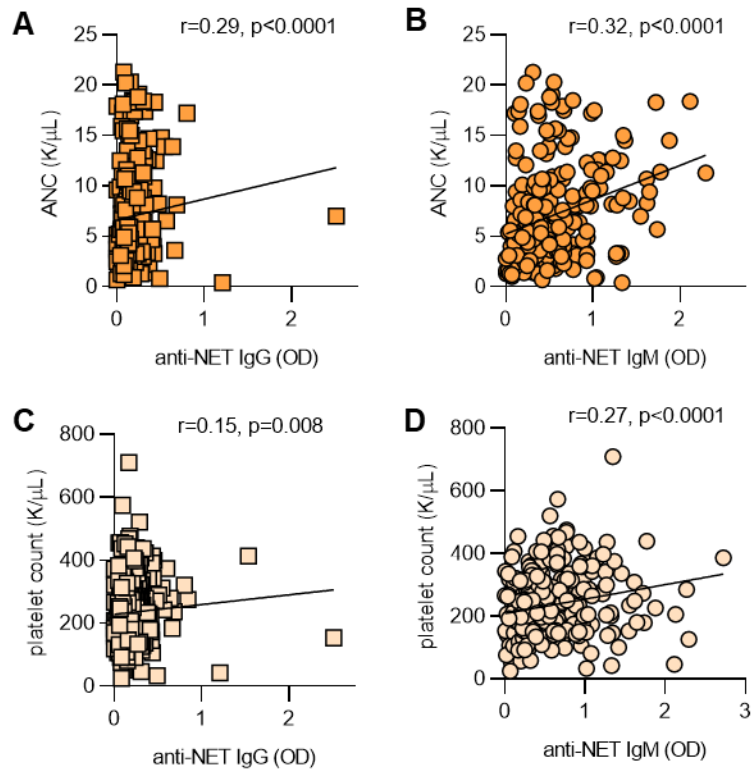

**Supplementary Figure 2: Association of anti-NET IgG/IgM with absolute neutrophil count (ANC) and platelet count.** **A-B**, Anti-NET IgG and IgM levels were compared to ANC on the same day as the research sample (n=266 COVID-19 patients). **C-D**, Anti-NET IgG and IgM levels were compared to platelet count on the same day as the research sample (n=315 COVID-19 patients). Spearman's correlation coefficients were calculated and are shown in the panels. ANC=absolute neutrophil counts.

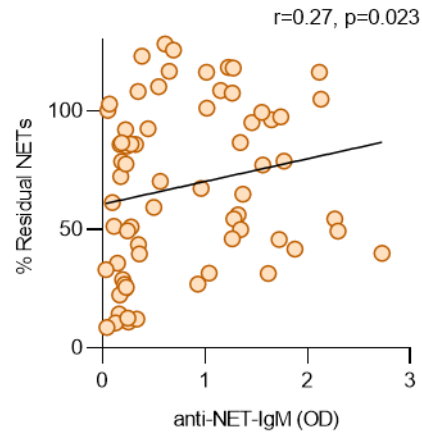

**Supplementary Figure 3: Anti-NET IgM correlates with impaired NET degradation.** Freshly-induced NETs were incubated with COVID sera, and percent residual NETs was determined for each sample after 90 minutes. Percent residual NETs was normalized against the mean of untreated NETs. Correlation with anti-NET IgM was determined by Spearman's method.
